# Supplementary material for: Open Access and the Institutional Repository -- University of Rhode Island
Source: Royal Society of Chemistry journal article supplement (doi:10.1039/d1an00029b), 2013-01-01
Supplement: d1an00029b1.pdf [file d1an00029b1.pdf]

## Supporting Information

Electrochemical detection of microRNA-21 based on Au nanoparticles functionalized g-C<sub>3</sub>N<sub>4</sub> nanosheet as sensing platform and hybridization chain reaction amplification strategy

Ya Wang Mengyao Li Yuzhong Zhang\*

(College of Chemistry and Materials Science, Anhui Key Laboratory of Chem-Biosensing, Anhui

Normal University, Wuhu 241002, People's Republic of China)

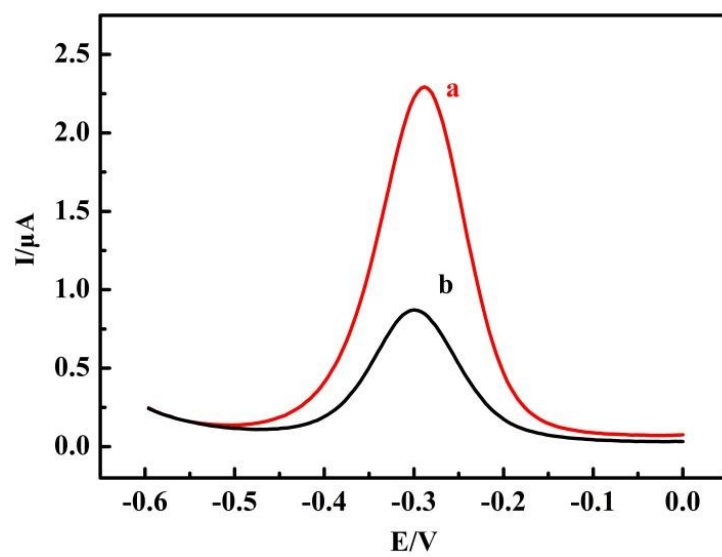

Fig.S1: DPV curves of the biosensor with Au NPs- g-  $C_3N_4$  NS (a) and Au NPs (b) as base material

Condition:  $C_{\text{microRNA}}=1.0 \text{ pM}$  , other conditions were the same

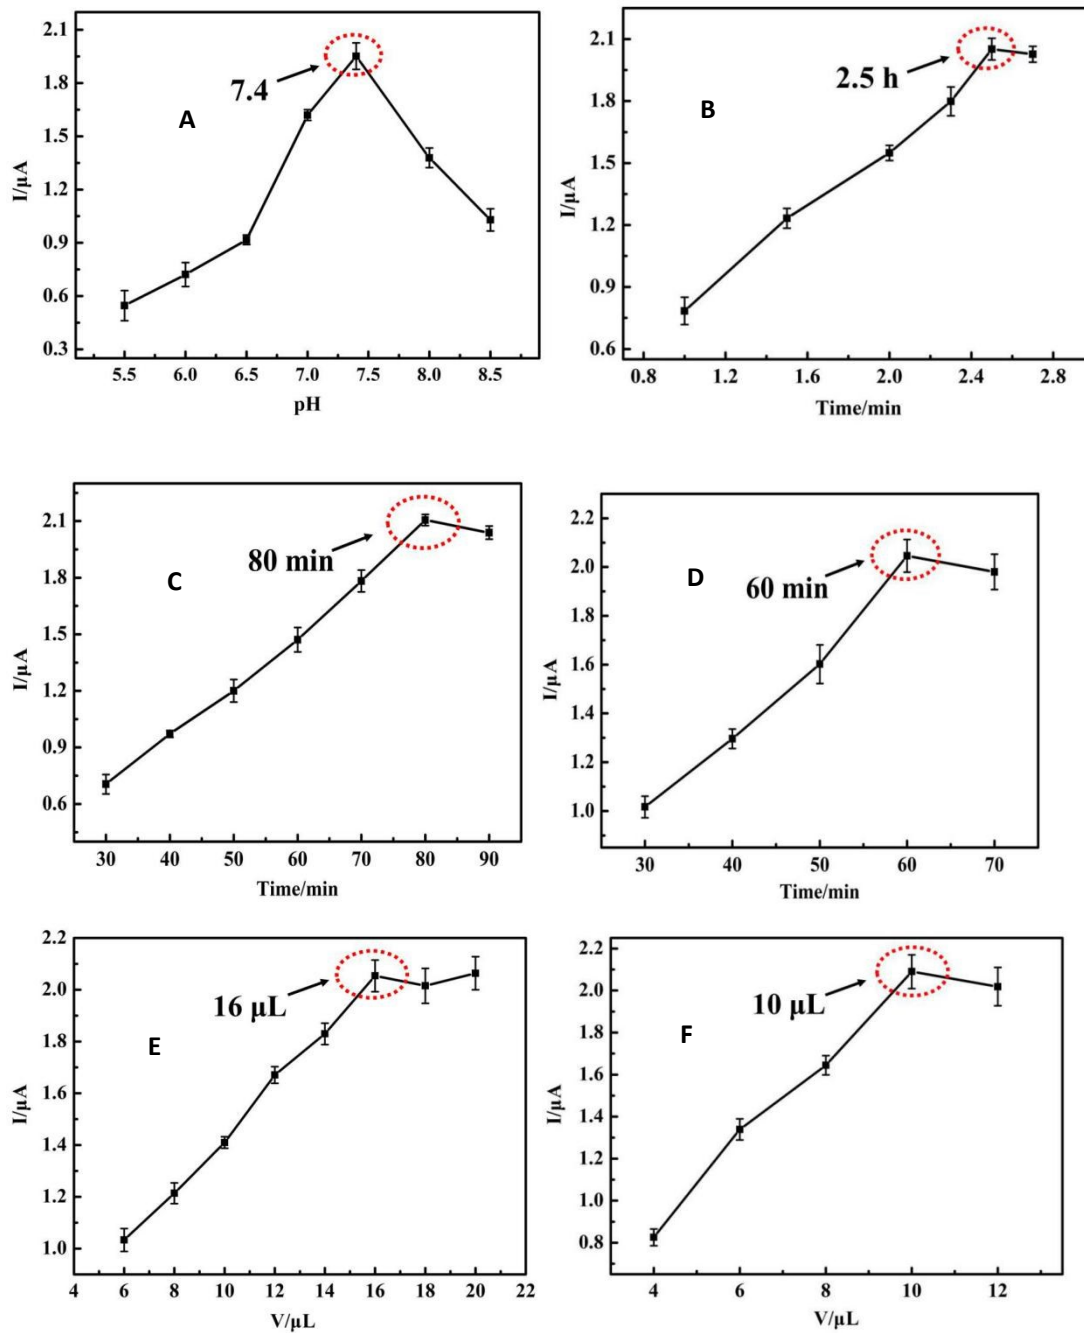

**Fig. S2.** Optimization of experimental conditions: (A) pH values ; (B) Incubation time of P<sub>1</sub>-P<sub>2</sub>; (C) Hybridization time between HP and micro RNA (E) Hybridization time between micro RNA and signal probes (F)

Amount of Au-g-C<sub>3</sub>N<sub>4</sub> NS; (D) Amount of HP : Conditions: C<sub>microRNA</sub>=1.0 pM

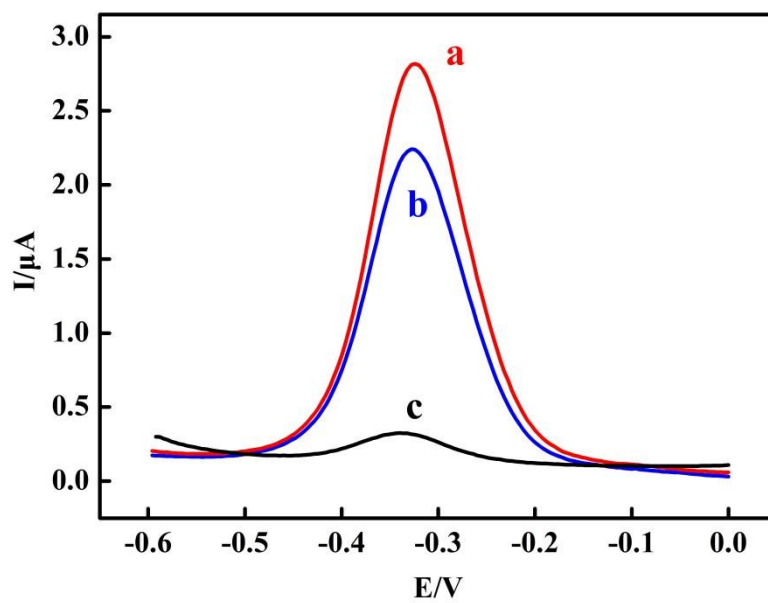

**Fig. S3.** DPV curves of biosensor in serum sample only (curve c) or containing 1.0 pM (b) and 10.0 pM (a) micro RNA-21, respectively.
